# Supplementary material for: Coronary artery disease-associated genetic variants and biomarkers of inflammation
Source: PubMed Central journal article supplement (PMC5501546; doi:10.1371/journal.pone.0180365), 2017-07-07
Supplement: pone.0180365.s001.pdf [file pone.0180365.s001.pdf]

## Competing Interests Statement

### **Regarding the manuscript entitled: “Coronary artery disease-associated genetic variants and biomarkers of inflammation”**

HKJ has received an unrestricted research grant from Pfizer, which was partly used to finance a minor part of the genetic analyses.

This does not alter our adherence to PLOS ONE policies on sharing data and materials.

All other authors report no competing interests.

On behalf of all authors,

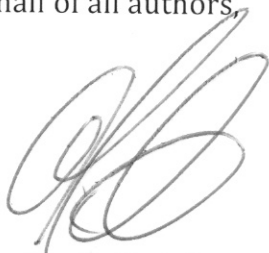A handwritten signature in black ink, appearing to be 'MKC', written over a light gray circular watermark.

Morten Krogh Christiansen (*corresponding author*)  
MD, PhD  
Aarhus University Hospital  
Department of Cardiology  
Palle Juul-Jensens Boulevard 99  
DK-8200 Aarhus  
Denmark
